# Supplementary material for: Determinants of Complementary Feeding Indicators: A Secondary Analysis of Thailand Multiple Indicators Cluster Survey 2019
Source: MDPI journal article supplement (doi:10.3390/nu14204370), 2022-10-18
Supplement: s1 [file s1]

## Supplementary Materials

Table S1. Comparison indicators in 2008 and 2021 and their key revision

| Indicators                                                                   | 2008 | 2021 | Key revision                                                                                                                                                                     |
|------------------------------------------------------------------------------|------|------|----------------------------------------------------------------------------------------------------------------------------------------------------------------------------------|
| Introduction of solid, semi-solid or soft foods 6–8 months (ISSSF)           | /    | /    | Calculation is now based on the food list question rather than the frequency of feeding question                                                                                 |
| Minimum dietary diversity 6–23 months (MDD)                                  | /    | /    | Breast milk added as an eighth food group and cut-off for minimum increased to five food groups                                                                                  |
| Minimum meal frequency 6–23 months (MMF)                                     | /    | /    | At least one non-milk feeding is required to meet minimum for non-breastfed children while the previous definition allowed children to achieve the minimum with milk feeds only. |
| Minimum acceptable diet 6–23 months (MAD)                                    | /    | /    |                                                                                                                                                                                  |
| Consumption of iron-rich or iron-fortified foods                             | /    | x    |                                                                                                                                                                                  |
| Minimum milk feeding frequency for non-breastfed children 6–23 months (MMFF) | /    | /    |                                                                                                                                                                                  |
| Egg and/or flesh food consumption 6–23 months (EFF)                          | x    | /    |                                                                                                                                                                                  |
| Sweet beverage consumption 6–23 months (SwB)                                 | x    | /    |                                                                                                                                                                                  |
| Unhealthy food consumption 6–23 months (UFC)                                 | x    | /    |                                                                                                                                                                                  |
| Zero vegetable or fruit consumption 6–23 months (ZVF)                        | x    | /    |                                                                                                                                                                                  |

**Table S2.** Factors associated with complementary feeding indicators in children who lived with their mothers, the univariate logistic regression analysis

|                                                                       | ISSSF |             | MDD    |            | MMF    |            | MMFF   |             | MAD    |            | EFF     |             | SWB    |            | UFC    |            | ZVF    |            |
|-----------------------------------------------------------------------|-------|-------------|--------|------------|--------|------------|--------|-------------|--------|------------|---------|-------------|--------|------------|--------|------------|--------|------------|
|                                                                       | OR    | 95% CI      | OR     | 95% CI     | OR     | 95% CI     | OR     | 95% CI      | OR     | 95% CI     | OR      | 95% CI      | OR     | 95% CI     | OR     | 95% CI     | OR     | 95% CI     |
| Gender of children (v male)                                           |       |             |        |            |        |            |        |             |        |            |         |             |        |            |        |            |        |            |
| Female                                                                | 0.59  | 0.30, 1.16  | 1.07   | 0.92, 1.25 | 0.83   | 0.60, 1.15 | 0.82   | 0.52, 1.28  | 1.07   | 0.92, 1.24 | 0.89    | 0.69, 1.14  | 1.08   | 0.93, 1.26 | 1.01   | 0.82, 1.25 | 0.97   | 0.80, 1.18 |
| Age of children (months) (v 6-8)                                      |       |             |        |            |        |            |        |             |        |            |         |             |        |            |        |            |        |            |
| 9-11                                                                  |       |             | 2.33** | 1.81, 3.01 | 4.09** | 2.42, 6.91 | 4.89   | 0.98, 24.53 | 2.47** | 1.91, 3.19 | 3.37**  | 2.38, 4.75  | 1.31*  | 1.01, 1.70 | 1.68*  | 1.06, 2.65 | 0.33** | 0.24, 0.45 |
| 12-17                                                                 |       |             | 3.81** | 3.01, 4.82 | 4.40** | 2.80, 6.92 | 1.17   | 0.46, 2.99  | 3.26** | 2.58, 4.12 | 7.43**  | 5.21, 10.59 | 1.41** | 1.12, 1.78 | 2.52** | 1.67, 3.81 | 0.29** | 0.22, 0.38 |
| 18-23                                                                 |       |             | 3.45** | 2.74, 4.33 | 3.40** | 2.26, 5.11 | 0.50   | 0.21, 1.19  | 3.25** | 2.59, 4.09 | 10.80** | 7.33, 15.92 | 1.46** | 1.16, 1.84 | 3.39** | 2.25, 5.12 | 0.26** | 0.20, 0.34 |
| Age of mothers or caregivers (years) (v >35)                          |       |             |        |            |        |            |        |             |        |            |         |             |        |            |        |            |        |            |
| 20-35                                                                 | 0.56  | 0.21, 1.48  | 0.85   | 0.70, 1.03 | 1.05   | 0.70, 1.57 | 0.59   | 0.30, 1.17  | 0.85   | 0.70, 1.02 | 0.80    | 0.57, 1.11  | 1.03   | 0.86, 1.25 | 1.14   | 0.87, 1.48 | 1.00   | 0.79, 1.28 |
| 15-19                                                                 | 1.89  | 0.21, 16.83 | 0.93   | 0.67, 1.30 | 1.12   | 0.54, 2.31 | 0.59   | 0.21, 1.65  | 0.92   | 0.66, 1.29 | 0.91    | 0.51, 1.62  | 0.96   | 0.69, 1.34 | 1.10   | 0.70, 1.74 | 1.04   | 0.69, 1.59 |
| Language of mothers or caregivers(v Thai)                             |       |             |        |            |        |            |        |             |        |            |         |             |        |            |        |            |        |            |
| Non-Thai                                                              | 1.87  | 0.56, 6.29  | 1.09   | 0.87, 1.37 | 0.77   | 0.50, 1.20 | 0.43** | 0.25, 0.76  | 0.98   | 0.78, 1.22 | 1.28    | 0.85, 1.90  | 0.74*  | 0.59, 0.91 | 0.65** | 0.48, 0.87 | 0.81   | 0.60, 1.10 |
| Education level of mothers or caregivers (v Kindergarten and Primary) |       |             |        |            |        |            |        |             |        |            |         |             |        |            |        |            |        |            |
| High school and above                                                 | 1.45  | 0.61, 3.47  | 1.52** | 1.22, 1.88 | 1.58*  | 1.03, 2.41 | 1.60   | 0.85, 3.03  | 1.57** | 1.26, 1.95 | 1.69**  | 1.21, 2.35  | 1.61** | 1.30, 2.01 | 1.08   | 0.80, 1.47 | 0.62** | 0.47, 0.80 |
| Wealth index quintiles (v poorest)                                    |       |             |        |            |        |            |        |             |        |            |         |             |        |            |        |            |        |            |
| Second                                                                | 2.48  | 0.83, 7.44  | 1.34*  | 1.06, 1.68 | 1.15   | 0.69, 1.90 | 1.43   | 0.75, 2.74  | 1.33*  | 1.06, 1.67 | 1.14    | 0.78, 1.67  | 1.26*  | 1.01, 1.58 | 0.92   | 0.66, 1.30 | 0.82   | 0.62, 1.08 |
| Middle                                                                | 3.17  | 0.97, 10.33 | 1.41** | 1.12, 1.77 | 1.22   | 0.73, 2.03 | 1.30   | 0.70, 2.41  | 1.33*  | 1.06, 1.67 | 1.19    | 0.82, 1.73  | 1.61** | 1.28, 2.01 | 0.70*  | 0.50, 0.97 | 0.66** | 0.50, 0.88 |
| Fourth                                                                | 1.09  | 0.43, 2.78  | 1.48** | 1.17, 1.87 | 0.88   | 0.55, 1.43 | 2.05*  | 1.03, 4.06  | 1.41** | 1.12, 1.79 | 1.15    | 0.78, 1.68  | 2.41** | 1.88, 3.09 | 0.58** | 0.41, 0.81 | 0.56** | 0.41, 0.75 |
| Richest                                                               | 0.82  | 0.32, 2.10  | 1.97** | 1.53, 2.54 | 1.20   | 0.70, 2.06 | 4.18** | 1.67, 10.44 | 2.01** | 1.56, 2.59 | 1.51    | 0.98, 2.32  | 1.77** | 1.38, 2.27 | 0.56** | 0.39, 0.81 | 0.44** | 0.31, 0.62 |
| Area (v urban)                                                        |       |             |        |            |        |            |        |             |        |            |         |             |        |            |        |            |        |            |
| Rural                                                                 | 1.07  | 0.53, 2.15  | 1.00   | 0.85, 1.17 | 1.04   | 0.74, 1.46 | 0.68   | 0.42, 1.11  | 1.00   | 0.85, 1.17 | 1.05    | 0.81, 1.37  | 0.85   | 0.73, 1.00 | 1.12   | 0.90, 1.39 | 1.11   | 0.90, 1.36 |
| Region (v Bangkok and Central)                                        |       |             |        |            |        |            |        |             |        |            |         |             |        |            |        |            |        |            |
| North                                                                 | 1.49  | 0.52, 4.28  | 0.72*  | 0.57, 0.90 | 1.16   | 0.68, 1.97 | 0.56   | 0.30, 1.06  | 0.66** | 0.52, 0.83 | 1.09    | 0.76, 1.56  | 0.65** | 0.52, 0.82 | 0.85   | 0.60, 1.21 | 1.04   | 0.77, 1.41 |
| Northeast                                                             | 1.50  | 0.63, 3.55  | 1.02   | 0.84, 1.24 | 0.93   | 0.61, 1.40 | 0.91   | 0.49, 1.68  | 1.02   | 0.84, 1.24 | 1.75**  | 1.24, 2.45  | 0.78*  | 0.64, 0.95 | 1.17   | 0.86, 1.59 | 1.24   | 0.97, 1.59 |
| South                                                                 | 1.33  | 0.56, 3.16  | 1.31*  | 1.06, 1.60 | 1.06   | 0.69, 1.64 | 0.78   | 0.42, 1.42  | 1.20   | 0.98, 1.46 | 1.79**  | 1.27, 2.52  | 0.86   | 0.70, 1.05 | 0.45** | 0.35, 0.59 | 0.85   | 0.65, 1.11 |
| Current breastfeeding (v No)                                          |       |             |        |            |        |            |        |             |        |            |         |             |        |            |        |            |        |            |

|  | ISSF  |            | MDD  |            | MMF    |            | MMFF |  | MAD    |            | EFF    |            | SWB    |            | UFC   |            | ZVF    |            |
|--|-------|------------|------|------------|--------|------------|------|--|--------|------------|--------|------------|--------|------------|-------|------------|--------|------------|
|  | 0.31* | 0.13, 0.72 | 1.00 | 0.85, 1.17 | 0.10** | 0.07, 0.16 |      |  | 0.76** | 0.65, 0.88 | 0.40** | 0.31, 0.52 | 0.17** | 0.15, 0.20 | 0.75* | 0.60, 0.95 | 1.37** | 1.12, 1.67 |

\*P < 0.05; \*\*P < 0.01, N/A = not available; \*\*\*\*reported receiving any breastmilk in the past 24 hours

ISSF = Introduction of solid, semi-solid or soft foods 6–8 months; MDD = Minimum dietary diversity 6–23 months; MMF = Minimum meal frequency 6–23 months; MMFF = Minimum milk feeding frequency for non-breastfed children 6–23 months; MAD = Minimum acceptable diet 6–23 months; EFF = Egg and/or flesh food consumption 6–23 months; SwB = Sweet beverage consumption 6–23 months; UFC = Unhealthy food consumption 6–23 months; ZVF = Zero vegetable or fruit consumption 6–23 months; OR = Odds ratio; 95%CI = 95% confidence interval

**Table S3.** Factors associated with complementary feeding indicators in children who lived with others, the univariate logistic regression analysis

|                                                                       | ISSF |            | MDD    |            | MMF    |              | MMFF  |            | MAD    |            | EFF     |             | SWB    |            | UFC  |            | ZVF    |            |
|-----------------------------------------------------------------------|------|------------|--------|------------|--------|--------------|-------|------------|--------|------------|---------|-------------|--------|------------|------|------------|--------|------------|
|                                                                       | OR   | 95% CI     | OR     | 95% CI     | OR     | 95% CI       | OR    | 95% CI     | OR     | 95% CI     | OR      | 95% CI      | OR     | 95% CI     | OR   | 95% CI     | OR     | 95% CI     |
| Gender of children (v male)                                           |      |            |        |            |        |              |       |            |        |            |         |             |        |            |      |            |        |            |
| Female                                                                | 1.02 | 0.20, 5.36 | 1.17   | 0.90, 1.52 | 1.08   | 0.49, 2.36   | 1.03  | 0.56, 1.89 | 1.19   | 0.92, 1.55 | 1.10    | 0.72, 1.69  | 1.71** | 1.23, 2.37 | 0.79 | 0.52, 1.22 | 0.97   | 0.71, 1.33 |
| Age of children (months) (v 6-8)                                      |      |            |        |            |        |              |       |            |        |            |         |             |        |            |      |            |        |            |
| 9-11                                                                  |      |            | 3.23** | 1.86, 5.60 | 0.79   | 0.19, 3.25   | 0.95  | 0.30, 3.00 | 3.75** | 2.11, 6.67 | 3.52**  | 1.88, 6.60  | 0.95   | 0.44, 2.05 | 1.68 | 0.47, 6.09 | 0.50*  | 0.29, 0.88 |
| 12-17                                                                 |      |            | 4.25** | 2.58, 6.98 | 10.67* | 1.09, 104.00 | 2.55  | 0.79, 8.27 | 4.97** | 2.94, 8.42 | 7.94**  | 4.33, 14.57 | 1.04   | 0.52, 2.09 | 1.81 | 0.56, 5.80 | 0.31** | 0.19, 0.51 |
| 18-23                                                                 |      |            | 4.23** | 2.61, 6.85 | 0.84   | 0.24, 2.95   | 0.93  | 0.34, 2.52 | 4.68** | 2.80, 7.81 | 13.58** | 7.12, 25.89 | 0.38** | 0.20, 0.73 | 2.61 | 0.82, 8.33 | 0.29** | 0.18, 0.48 |
| Age of mothers or caregivers (years) (v >35)                          |      |            |        |            |        |              |       |            |        |            |         |             |        |            |      |            |        |            |
| 20-35                                                                 | N/A  |            | 1.34   | 0.39, 4.56 | 0.37   | 0.04, 3.23   | 0.12* | 0.03, 0.53 | 0.89   | 0.26, 3.00 | 0.49    | 0.10, 2.36  | 0.59   | 0.15, 2.29 | 0.98 | 0.10, 9.75 | 1.19   | 0.31, 4.55 |
| 15-19                                                                 |      |            |        |            |        |              |       |            |        |            |         |             |        |            |      |            |        |            |
| Language of mothers or caregivers(v Thai)                             |      |            |        |            |        |              |       |            |        |            |         |             |        |            |      |            |        |            |
| Non-Thai                                                              | 0.48 | 0.05, 4.32 | 1.18   | 0.88, 1.58 | 1.50   | 0.66, 3.41   | 1.06  | 0.53, 2.09 | 1.11   | 0.82, 1.49 | 0.81    | 0.49, 1.34  | 0.77   | 0.52, 1.12 | 1.07 | 0.67, 1.72 | 0.86   | 0.61, 1.23 |
| Education level of mothers or caregivers (v Kindergarten and Primary) |      |            |        |            |        |              |       |            |        |            |         |             |        |            |      |            |        |            |
| High school and above                                                 | N/A  |            | 1.25   | 0.71, 2.21 | 0.88   | 0.22, 3.51   | 0.77  | 0.22, 2.64 | 1.35   | 0.76, 2.39 | 1.40    | 0.50, 3.92  | 1.03   | 0.49, 2.20 | 0.51 | 0.22, 1.19 | 0.59   | 0.29, 1.23 |

|                                    | ISSF  |             | MDD    |            | MMF    |             | MMFF |             | MAD    |            | EFF    |             | SWB    |            | UFC  |            | ZVF    |            |
|------------------------------------|-------|-------------|--------|------------|--------|-------------|------|-------------|--------|------------|--------|-------------|--------|------------|------|------------|--------|------------|
| Wealth index quintiles (v poorest) |       |             |        |            |        |             |      |             |        |            |        |             |        |            |      |            |        |            |
| Second                             | 1.47  | 0.12, 17.21 | 1.67** | 1.19, 2.34 | 1.37   | 0.48, 3.92  | 1.09 | 0.54, 2.22  | 1.69** | 1.20, 2.38 | 1.16   | 0.67, 2.00  | 1.16   | 0.76, 1.78 | 1.07 | 0.59, 1.94 | 0.73   | 0.49, 1.08 |
| Middle                             | 1.40  | 0.12, 16.46 | 1.57*  | 1.08, 2.27 | 0.98   | 0.34, 2.80  | 1.97 | 0.77, 5.06  | 1.61*  | 1.10, 2.34 | 0.97   | 0.55, 1.72  | 0.81   | 0.53, 1.26 | 0.63 | 0.35, 1.13 | 0.61*  | 0.39, 0.96 |
| Fourth                             | N/A   |             | 1.39   | 0.91, 2.10 | 2.04   | 0.43, 9.60  | 4.00 | 0.91, 17.51 | 1.52   | 0.99, 2.32 | 1.90   | 0.85, 4.24  | 0.86   | 0.52, 1.42 | 0.55 | 0.29, 1.04 | 0.62   | 0.37, 1.04 |
| Richest                            | 0.03* | 0.00, 0.55  | 1.92*  | 1.03, 3.59 | 0.54   | 0.14, 2.06  | 1.02 | 0.29, 3.61  | 1.99*  | 1.07, 3.70 | 1.18   | 0.44, 3.17  | 1.60   | 0.69, 3.71 | 0.93 | 0.32, 2.71 | 0.52   | 0.23, 1.15 |
| Area (v urban)                     |       |             |        |            |        |             |      |             |        |            |        |             |        |            |      |            |        |            |
| Rural                              | 6.08* | 1.10, 33.73 | 0.95   | 0.70, 1.29 | 0.60   | 0.21, 1.78  | 0.99 | 0.48, 2.05  | 0.98   | 0.72, 1.34 | 0.59   | 0.33, 1.05  | 0.86   | 0.59, 1.27 | 1.09 | 0.67, 1.78 | 1.41   | 0.95, 2.09 |
| Region (v Bangkok and Central)     |       |             |        |            |        |             |      |             |        |            |        |             |        |            |      |            |        |            |
| North                              | 0.65  | 0.06, 7.64  | 1.13   | 0.72, 1.78 | 1.48   | 0.29, 7.50  | 1.15 | 0.39, 3.40  | 1.16   | 0.73, 1.86 | 1.31   | 0.68, 2.55  | 1.41   | 0.80, 2.48 | 0.67 | 0.31, 1.46 | 0.64   | 0.37, 1.11 |
| Northeast                          | 6.65  | 0.66, 67.43 | 1.97** | 1.43, 2.70 | 0.89   | 0.35, 2.29  | 1.25 | 0.60, 2.61  | 2.15** | 1.55, 2.97 | 2.31** | 1.43, 3.73  | 1.58*  | 1.08, 2.30 | 0.71 | 0.41, 1.22 | 0.55** | 0.38, 0.79 |
| South                              | 0.78  | 0.07, 8.93  | 2.95** | 1.74, 5.00 | 2.68   | 0.32, 22.62 | 0.99 | 0.33, 2.94  | 2.75** | 1.63, 4.64 | 4.55*  | 1.57, 13.15 | 1.40   | 0.78, 2.52 | 0.52 | 0.26, 1.07 | 0.34** | 0.17, 0.65 |
| Current breastfeeding (v No)       |       |             |        |            |        |             |      |             |        |            |        |             |        |            |      |            |        |            |
|                                    | 0.26  | 0.02, 2.74  | 0.92   | 0.41, 2.04 | 0.06** | 0.02, 0.17  |      |             | 0.45   | 0.19, 1.09 | 0.36*  | 0.14, 0.93  | 0.28** | 0.12, 0.61 | 1.21 | 0.25, 5.80 | 1.48   | 0.61, 3.58 |

\*P < 0.05; \*\*P < 0.01, N/A = not available; \*\*\*\*reported receiving any breastmilk in the past 24 hours

ISSF = Introduction of solid, semi-solid or soft foods 6–8 months; MDD = Minimum dietary diversity 6–23 months; MMF = Minimum meal frequency 6–23 months; MMFF = Minimum milk feeding frequency for non-breastfed children 6–23 months; MAD = Minimum acceptable diet 6–23 months; EFF = Egg and/or flesh food consumption 6–23 months; SwB = Sweet beverage consumption 6–23 months; UFC = Unhealthy food consumption 6–23 months; ZVF = Zero vegetable or fruit consumption 6–23 months; OR = Odds ratio; 95%CI = 95% confidence interval
